# Supplementary material for: Repeat-dose toxicity study of human umbilical cord mesenchymal stem cells in cynomolgus monkeys by intravenous and subcutaneous injection
Source: Front Cell Dev Biol. 2023 Oct 25;11:1273723. doi: 10.3389/fcell.2023.1273723 (PMC10630163; doi:10.3389/fcell.2023.1273723)
Supplement: Supplementary file 1 [file DataSheet1.xlsx]

## Sheet: Supplementary Table 1
Supplementary Table 1. Food intake(grade A~F) in cynomolgus monkeys treated with hUC-MSCs in repeat-dose toxicity study
Time	n	grade	Control	3.0×106cells/kg i.v	3.0×107cells/kg i.v	3.0×107cells/kg s.c
D-4	10	B	2	5	1	5
		C	8	4	8	5
		D	0	1	1	0
D3	10	B	4	1	0	3
		C	6	8	9	6
		D	0	1	1	1
Significance					*
D10	10	B	2	5	2	5
		C	8	4	6	3
		D	0	1	2	2
D17	10	B	5	2	0	3
		C	5	7	7	3
		D	0	1	3	4
Significance					**
D24	10	B	5	3	3	3
		C	5	3	5	5
		D	0	4	2	2
Dr6	4	B	3	2	3	4
		C	1	2	1	0
Dr13	4	B	3	4	1	3
		C	1	0	2	1
		D	0	0	1	0
Dr20	4	B	1	0	0	1
		C	1	1	1	2
		D	2	3	1	1
		E	0	0	2	0
Dr27	4	B	3	4	2	3
		C	1	0	1	1
		D	0	0	1	0
Note: *P < 0.05,**P < 0.01 when compared to the control group.

## Sheet: Supplementary Table 2
Supplementary Table 2. Temperature in cynomolgus monkeys treated with hUC-MSCs in repeat-dose toxicity study(℃,Mean±SD)
Time	n	Control			3.0×106cells/kg i.v			3.0×107cells/kg i.v			3.0×107cells/kg s.c
D-14	10	37.9	±	0.6	37.6	±	0.7	37.2	±	0.5*	37.4	±	0.5*
D-6	10	37.5	±	0.4	37.4	±	0.4	37.4	±	0.4	37.3	±	0.3
D1	10	37.3	±	0.3	37.5	±	0.3	37.2	±	0.5	37.3	±	0.4
D8	10	37	±	0.3	37.2	±	0.5	37.4	±	0.4	37.4	±	0.3**
D15	10	37.4	±	0.5	37.3	±	0.5	37.2	±	0.3	37.6	±	0.3
D22	10	37.4	±	0.4	37.3	±	0.4	37.2	±	0.4	37.6	±	0.4
D29	10	37.7	±	0.2	37.8	±	0.5	37.6	±	0.5	37.7	±	0.3
Dr5	4	37.4	±	0.4	37.1	±	0.3	37.6	±	0.4	37.3	±	0.1
Dr12	4	38	±	0.4	38	±	0.4	38	±	0.3	37.5	±	0.5
Dr19	4	37.5	±	0.6	37.6	±	0.3	37.5	±	0.4	38	±	0.3
Dr26	4	37.8	±	0.4	37.4	±	0.3	37.5	±	0.5	37.9	±	0.2
Note: Data were expressed as Mean±SD. * P < 0.05 * * P < 0.01 when compared to the control group.

## Sheet: Supplementary Table 3
Supplementary Table 3.1 Hematology analysis in cynomolgus monkeys treated with hUC-MSCs in repeat-dose toxicity study (After 2nd administration)
Parameter	After 2nd administration (n = 10)
	Control			3.0×106cells/kg i.v			3.0×107cells/kg i.v			3.0×107cells/kg s.c
WBC(10e3/μL)	8.12	±	1.98	11.41	±	4.55	10.85	±	1.97	15.53	±	3.65**
RBC(10e6/μL)	5.55	±	0.41	5.13	±	0.32*	5.43	±	0.37	5.17	±	0.44
HGB(g/dL)	126	±	6	117	±	9*	123	±	8	119	±	10
HCT(%)	44.2	±	2.4	40.6	±	2.7**	42.4	±	2.4	40.6	±	3.1**
MCV(fL)	79.8	±	2.4	79.1	±	2.4	78.1	±	3.4	78.6	±	2.9
MCH(pg)	22.7	±	0.9	22.8	±	0.7	22.6	±	0.7	23	±	0.7
MCHC(g/dL)	285	±	8	288	±	7	290	±	11	292	±	7
RDW(%)	12.3	±	0.4	12.9	±	0.6	12.6	±	0.4	12.9	±	0.8
PLT(10e3/μL)	530	±	109	421	±	58**	439	±	74*	500	±	107
MPV(fL)	8	±	1	8.4	±	0.6	7.8	±	0.7	8.2	±	0.7
%NEUT(%)	40.7	±	14.2	68.8	±	10.2**	64.5	±	9.5**	73.7	±	8.8**
%LYMPH(%)	52.3	±	12.5	26.2	±	8.5**	29.6	±	9.3**	20.6	±	7.7**
%MONO(%)	4.1	±	0.8	3.1	±	1.3	3.9	±	1.5	4.2	±	1.9
%EOS(%)	1.6	±	1.6	0.8	±	1.4	0.7	±	0.3	0.8	±	0.8
%BASO(%)	0.3	±	0.1	0.2	±	0.1	0.2	±	0.1	0.2	±	0.1
%LUC(%)	1.1	±	0.5	1	±	0.5	1.1	±	0.5	0.7	±	0.4*
#NEUT(10e3/μL)	3.2	±	1.13	8.1	±	3.98*	7.09	±	2.10**	11.59	±	3.62**
#LYMPH(10e3/μL)	4.33	±	1.57	2.79	±	0.80**	3.14	±	0.96*	3.05	±	0.91*
#MONO(10e3/μL)	0.34	±	0.12	0.32	±	0.11	0.41	±	0.14	0.65	±	0.36*
#EOS(10e3/μL)	0.14	±	0.13	0.07	±	0.11	0.07	±	0.03	0.11	±	0.09
#BASO(10e3/μL)	0.02	±	0.01	0.03	±	0.01	0.03	±	0.01	0.03	±	0.02
#LUC(10e3/μL)	0.09	±	0.05	0.1	±	0.04	0.12	±	0.05	0.1	±	0.05
%RETIC(%)	1.18	±	0.26	1.29	±	0.41	1.3	±	0.32	1.49	±	0.17**
#RETIC(10e9/L)	65.4	±	14.8	65.6	±	19.7	70.4	±	17.8	76.4	±	7.3*
PT(s)	8.9	±	0.6	9	±	0.4	9.2	±	0.4	8.9	±	0.7
Fbg(g/L)	2.318	±	0.439	2.326	±	0.564	2.456	±	0.485	2.439	±	0.432
APTT(s)	25.9	±	2.6	27.7	±	4.4	26.2	±	2.4	26.5	±	2.4
Note: Data were expressed as means ± SD. *,** Indicate a statistically significant difference at P < 0.05 and P < 0.01 when compared to the control group.Abbreviation: WBC, white blood cell; RBC, red blood cell count; HGB, haemoglobin concentration; HCT, hematocrit; MCV, mean cell volume; MCH, mean cell haemoglobin; MCHC, mean cell haemoglobin concentration; RDW, Red blood Cell distribution width…
Supplementary Table 3.2 Hematology analysis in cynomolgus monkeys treated with hUC-MSCs in repeat-dose toxicity study (End of the dosing phase)
Parameter	End of the dosing phase (n = 10)
	Control			3.0×106cells/kg i.v			3.0×107cells/kg i.v			3.0×107cells/kg s.c
WBC(10e3/μL)	8.95	±	2.38	12.63	±	4.22*	12.46	±	3.42*	13.25	±	3.94**
RBC(10e6/μL)	5.81	±	0.41	5.54	±	0.23	5.73	±	0.47	5.65	±	0.42
HGB(g/dL)	138	±	7	130	±	6	133	±	10	131	±	9
HCT(%)	46.7	±	2.2	44.5	±	2.3	44.8	±	2.6	44.4	±	2.8*
MCV(fL)	80.5	±	3.2	80.3	±	2.7	78.4	±	3.1	78.6	±	2.9
MCH(pg)	23.7	±	0.9	23.4	±	0.6	23.2	±	0.8	23.1	±	0.9
MCHC(g/dL)	295	±	6	292	±	9	296	±	9	294	±	7
RDW(%)	12.2	±	0.6	12.9	±	0.7*	13.5	±	0.7**	12.5	±	0.7
PLT(10e3/μL)	450	±	82	410	±	54	503	±	148	479	±	112
MPV(fL)	8.7	±	1.2	8.8	±	0.6	8.4	±	0.7	8.4	±	0.8
%NEUT(%)	34	±	10.3	29.3	±	14.4	34.5	±	17.8	43.2	±	15.7
%LYMPH(%)	58.9	±	10	65	±	14.2	60.3	±	17.8	50	±	16.3
%MONO(%)	4	±	0.6	2.3	±	0.6**	2.5	±	0.9**	2.5	±	0.9**
%EOS(%)	1.9	±	1.3	1.9	±	2.3	1.4	±	0.9	3.1	±	1.9
%BASO(%)	0.3	±	0.1	0.5	±	0.2**	0.4	±	0.1	0.4	±	0.1
%LUC(%)	0.9	±	0.3	1	±	0.4	0.9	±	0.5	0.9	±	0.3
#NEUT(10e3/μL)	2.93	±	0.91	3.96	±	3	4.5	±	2.92	5.85	±	2.91*
#LYMPH(10e3/μL)	5.35	±	1.95	7.97	±	2.81	7.34	±	2.69	6.48	±	2.46
#MONO(10e3/μL)	0.36	±	0.12	0.29	±	0.11	0.29	±	0.11	0.33	±	0.15
#EOS(10e3/μL)	0.19	±	0.17	0.22	±	0.22	0.17	±	0.1	0.41	±	0.28*
#BASO(10e3/μL)	0.03	±	0.02	0.07	±	0.04*	0.05	±	0.02*	0.05	±	0.03*
#LUC(10e3/μL)	0.09	±	0.04	0.13	±	0.07	0.11	±	0.05	0.12	±	0.05
%RETIC(%)	0.82	±	0.2	0.89	±	0.3	1.14	±	0.20**	1.1	±	0.39
#RETIC(10e9/L)	47.3	±	11.4	48.8	±	15.6	64.8	±	9.3**	61.2	±	19.8
PT(s)	9.7	±	0.7	9.4	±	0.6	9.7	±	0.6	9.4	±	0.6
Fbg(g/L)	1.744	±	0.22	1.914	±	0.215	1.899	±	0.396	1.747	±	0.309
APTT(s)	29.6	±	3.2	28.5	±	2.2	32.1	±	4.4	28.8	±	4.1
Note: Data were expressed as means ± SD. *,** Indicate a statistically significant difference at P < 0.05 and P < 0.01 when compared to the control group.
Supplementary Table 3.3 Hematology analysis in cynomolgus monkeys treated with hUC-MSCs in repeat-dose toxicity study (End of the recovery period)
Parameter	End of the recovery period (n = 4)
	Control			3.0×106cells/kg i.v			3.0×107cells/kg i.v			3.0×107cells/kg s.c
WBC(10e3/μL)	8.93	±	1.69	10.35	±	3.07	11.62	±	5.44	12.83	±	5
RBC(10e6/μL)	6.05	±	0.5	5.87	±	0.34	5.85	±	0.62	6.01	±	0.41
HGB(g/dL)	141	±	9	137	±	10	138	±	14	141	±	9
HCT(%)	48.4	±	3.2	48	±	5.1	47.7	±	6.2	47.5	±	3
MCV(fL)	80.2	±	2.6	81.6	±	4	81.4	±	2.7	79.1	±	1.8
MCH(pg)	23.4	±	0.9	23.3	±	0.5	23.5	±	0.2	23.5	±	0.9
MCHC(g/dL)	292	±	3	286	±	10	290	±	9	297	±	14
RDW(%)	11.8	±	0.7	12.3	±	0.5	12.5	±	0.4	12.6	±	1
PLT(10e3/μL)	375	±	90	355	±	46	356	±	91	419	±	125
MPV(fL)	8.2	±	1	8.6	±	0.8	9.1	±	1.1	8.3	±	1.2
%NEUT(%)	35.6	±	6	29.6	±	5	34	±	11.2	24.9	±	10.7
%LYMPH(%)	57	±	7.4	64.5	±	5.6	60.1	±	12.5	68.6	±	11.9
%MONO(%)	4	±	0.9	2.8	±	0.6	2.6	±	1.3	3.2	±	0.6
%EOS(%)	2.1	±	1.1	1.8	±	1.5	2	±	1.2	1.6	±	1.1
%BASO(%)	0.3	±	0.2	0.4	±	0.2	0.4	±	0.2	0.5	±	0.1
%LUC(%)	1.1	±	0.5	1	±	0.5	1	±	0.1	1.3	±	0.3
#NEUT(10e3/μL)	3.17	±	0.68	2.97	±	0.56	3.51	±	0.66	3.38	±	2.6
#LYMPH(10e3/μL)	5.1	±	1.27	6.78	±	2.53	7.48	±	4.95	8.62	±	2.74
#MONO(10e3/μL)	0.35	±	0.09	0.27	±	0.04	0.28	±	0.09	0.4	±	0.12
#EOS(10e3/μL)	0.19	±	0.1	0.18	±	0.15	0.19	±	0.08	0.22	±	0.17
#BASO(10e3/μL)	0.03	±	0.02	0.04	±	0.03	0.05	±	0.05	0.06	±	0.04
#LUC(10e3/μL)	0.09	±	0.04	0.11	±	0.08	0.12	±	0.05	0.16	±	0.07
%RETIC(%)	0.73	±	0.17	0.64	±	0.29	0.69	±	0.23	0.74	±	0.18
#RETIC(10e9/L)	43.9	±	11.2	38.3	±	19.2	39.9	±	12.7	44.4	±	9.5
PT(s)	10.3	±	1.1	11.7	±	1.2	10.2	±	0.1	11.6	±	1.1
Fbg(g/L)	2.04	±	0.278	1.932	±	0.069	2.066	±	0.257	1.794	±	0.233
APTT(s)	27	±	2	33	±	9.1	31.8	±	7.9	27.3	±	2.7
Note: Data were expressed as means ± SD. P > 0.05 when compared to the control group.

## Sheet: Supplementary Table 4
Supplementary Table 4.1 ECG analysis in cynomolgus monkeys treated with hUC-MSCs in repeat-dose toxicity study (After 2nd administration)
Parameter	After 2nd administration (n = 10)
	Control			3.0×106cells/kg i.v			3.0×107cells/kg i.v			3.0×107cells/kg s.c
RR（ms）	230	±	15	236	±	18	238	±	16	230	±	16
HR（bpm）	262	±	16	256	±	19	254	±	17	262	±	18
PR（ms）	51.8	±	3.6	46.8	±	8.8	50.9	±	7.4	50.8	±	9.6
Pdur（ms）	34.9	±	5.9	32.7	±	4.5	35	±	5.7	33	±	4.9
QRS（ms）	67	±	2.8	71.3	±	6.3	67.6	±	6.8	66.5	±	8.3
Ramp（mV）	0.966	±	0.451	1.037	±	0.558	0.634	±	0.416	0.844	±	0.47
STlevel（mV）	-0.079	±	0.026	-0.089	±	0.046	-0.065	±	0.024	-0.052	±	0.033
Ste（mV）	0.031	±	0.023	0.018	±	0.038	0.019	±	0.016	0.043	±	0.025
QT（ms）	163	±	12	165	±	13	167	±	7	158	±	14
QTcB（ms）	339	±	17	340	±	19	344	±	13	330	±	24
QTcF（ms）	265	±	15	267	±	17	270	±	9	258	±	20
Note: Data were expressed as Mean±SD. Abbreviation: RR,RR interval; HR,Heart Rate; PR,PR interval; QRS,QRS wave complex; QT,QT interval; QTc,QTc Corrected QT interval.
Supplementary Table 4.2 ECG analysis in cynomolgus monkeys treated with hUC-MSCs in repeat-dose toxicity study (End of the dosing phase)
Parameter	End of the dosing phase (n = 10)
	Control			3.0×106cells/kg i.v			3.0×107cells/kg i.v			3.0×107cells/kg s.c
RR（ms）	241	±	25	235	±	12	246	±	34	232	±	20
HR（bpm）	251	±	26	256	±	13	248	±	32	261	±	25
PR（ms）	54.1	±	5.7	47.5	±	6.5	48.7	±	6.9	46.1	±	5.8**
Pdur（ms）	36.9	±	4	32.4	±	4.1	32.1	±	7.6	32.4	±	4.4*
QRS（ms）	67.8	±	5.2	70.7	±	4.6	68.7	±	5.9	65.1	±	9.9
Ramp（mV）	0.947	±	0.411	1.102	±	0.738	0.906	±	0.678	0.916	±	0.323
STlevel（mV）	-0.078	±	0.036	-0.095	±	0.047	-0.09	±	0.054	-0.071	±	0.041
Ste（mV）	0.021	±	0.02	0.014	±	0.026	0.012	±	0.044	0.025	±	0.014
QT（ms）	168	±	17	161	±	9	170	±	16	161	±	16
QTcB（ms）	341	±	18	333	±	15	343	±	21	334	±	24
QTcF（ms）	269	±	18	262	±	12	271	±	18	262	±	21
Note: Data were expressed as Mean±SD. * P < 0.05 * * P < 0.01 when compared to the control group.Abbreviation: RR,RR interval; HR,Heart Rate; PR,PR interval; QRS,QRS wave complex; QT,QT interval; QTc,QTc Corrected QT interval.
Supplementary Table 4.3 ECG analysis in cynomolgus monkeys treated with hUC-MSCs in repeat-dose toxicity study (End of the recovery period)
Parameter	End of the recovery period (n = 4)
	Control			3.0×106cells/kg i.v			3.0×107cells/kg i.v			3.0×107cells/kg s.c
RR（ms）	227.1	±	23.1	245.5	±	9.7	242.2	±	32.1	226.8	±	21
HR（bpm）	266.1	±	24.5	244.7	±	9.6	251	±	32.4	266.4	±	25.9
PR（ms）	51.4	±	10.5	47.1	±	10.7	50.9	±	9.2	53	±	14.1
Pdur（ms）	38.4	±	3.9	30.7	±	5.3	36.8	±	5.3	34.1	±	7.8
QRS（ms）	66.3	±	6	66.9	±	6.4	67.6	±	8.9	67.5	±	8.9
Ramp（mV）	0.921	±	0.458	1.053	±	0.619	0.79	±	0.394	0.956	±	0.275
STlevel（mV）	-0.081	±	0.041	-0.1	±	0.032	-0.063	±	0.038	-0.082	±	0.044
Ste（mV）	0.03	±	0.009	-0.005	±	0.022*	0.022	±	0.013	0.035	±	0.017
QT（ms）	156.2	±	12.9	163	±	12.7	159.2	±	4.6	157.7	±	9.5
QTcB（ms）	327.7	±	10.6	329	±	22.2	325	±	20.6	331.3	±	6.9
QTcF（ms）	255.9	±	12.5	260.4	±	18.3	256.1	±	11.4	258.7	±	8.2
Note: Data were expressed as Mean±SD. * P < 0.05 * * P < 0.01 when compared to the control group.Abbreviation: RR,RR interval; HR,Heart Rate; PR,PR interval; QRS,QRS wave complex; QT,QT interval; QTc,QTc Corrected QT interval.

## Sheet: Supplementary Table 5
Supplementary Table 5.1 Complement C3, C4 and percentage of CD3+, CD4+, CD8+ lymphocytes in cynomolgus monkeys treated with hUC-MSCs after 2nd administration
Parameter	After 2nd administration (n = 10)
	Control			3.0×106cells/kg i.v			3.0×107cells/kg i.v			3.0×107cells/kg s.c
IgG(g/L)	10.4	±	2.43	10.02	±	2.17	9.57	±	1.75	8.31	±	1.66*
IgM(g/L)	0.97	±	0.26	0.72	±	0.19	0.79	±	0.44	0.7	±	0.24*
C3(mg/dL)	127.36	±	20.17	132.78	±	21.4	137.41	±	26.03	121.86	±	16.38
C4(mg/dL)	27.88	±	9.16	34.99	±	7.71	33.57	±	8.56	35.35	±	8.96
CD3+(%)	63.57	±	5.54	68.87	±	7.79	70.17	±	5.01	62.3	±	11.8
CD3+CD4+(%)	62.2	±	7.01	62.09	±	7.35	62.69	±	9.17	58.27	±	8.68
CD3+CD8+(%)	31.02	±	4.54	31.66	±	6.33	29.81	±	7.42	35.02	±	8.08
CD4+/CD8a+	2.08	±	0.58	2.07	±	0.62	2.29	±	0.86	1.8	±	0.69
Note: Data were expressed as means ± SD. *,** Indicate a statistically significant difference at P < 0.05 when compared to the control group.
Supplementary Table 5.2 Complement C3, C4 and percentage of CD3+, CD4+, CD8+ lymphocytes in cynomolgus monkeys treated with hUC-MSCs at end of the dosing phase
Parameter	End of the dosing phase (n = 10)
	Control			3.0×106cells/kg i.v			3.0×107cells/kg i.v			3.0×107cells/kg s.c
IgG(g/L)	11.56	±	3.3	13.3	±	2.19	12.32	±	1.99	13.59	±	2.34
IgM(g/L)	0.9	±	0.26	0.87	±	0.24	0.8	±	0.38	0.81	±	0.18
C3(mg/dL)	116.91	±	20.17	124.22	±	19.09	118.43	±	22.59	113.45	±	19.33
C4(mg/dL)	20.29	±	9.07	23.98	±	5.72	24.32	±	12.6	27.21	±	6.75
CD3+(%)	60.89	±	5.98	41.11	±	7.92**	45.16	±	6.55**	45.73	±	9.06**
CD3+CD4+(%)	60.52	±	5.78	62.35	±	8.36	63.13	±	5.93	59.9	±	7.67
CD3+CD8+(%)	32.3	±	4.52	29.92	±	6.91	28.26	±	4.31	32.23	±	7
CD4+/CD8a+	1.93	±	0.47	2.24	±	0.77	2.3	±	0.49	1.98	±	0.64
Note: Data were expressed as means ± SD. ** Indicate a statistically significant difference at P < 0.01 when compared to the control group;
Supplementary Table 5.3 Complement C3, C4 and percentage of CD3+, CD4+, CD8+ lymphocytes in cynomolgus monkeys treated with hUC-MSCs at end of the recovery period
Parameter	End of the recovery period (n = 4)
	Control			3.0×106cells/kg i.v			3.0×107cells/kg i.v			3.0×107cells/kg s.c
IgG(g/L)	10.99	±	3.16	11.88	±	1.34	15.32	±	4.45	10.01	±	0.91
IgM(g/L)	0.9	±	0.5	0.7	±	0.26	0.6	±	0.3	0.66	±	0.14
C3(mg/dL)	115.88	±	17.72	96.73	±	13.66	108.49	±	25.87	95.87	±	20.3
C4(mg/dL)	24.65	±	12.26	21.61	±	6.51	22.2	±	6.27	16.74	±	6.79
CD3+(%)	61.85	±	5.04	50.48	±	4.56*	51.77	±	5.52*	47.56	±	13.23
CD3+CD4+(%)	59.51	±	4.08	61.4	±	10.65	60.63	±	6.61	52.95	±	9.87
CD3+CD8+(%)	31.95	±	1.03	31.44	±	8.75	31.03	±	5.45	37.28	±	8.3
CD4+/CD8a+	1.87	±	0.19	2.15	±	0.94	2.02	±	0.52	1.53	±	0.67
Note: Data were expressed as means ± SD. *,** Indicate a statistically significant difference at P < 0.05 and P < 0.01 when compared to the control group;

## Sheet: Supplementary Table 6
Supplementary Table 6. Organ weights and organ ratios in cynomolgus monkeys treated with hUC-MSCs in repeat-dose toxicity study
Parameter			End of the dosing phase						End of the recovery period
		n	Control	3.0´106cells/kg i.v	3.0´107cells/kg i.v	3.0´107cells/kg s.c		n	Control	3.0´106cells/kg i.v	3.0´107cells/kg i.v	3.0´107cells/kg s.c
Heart	organ weight (g)	6	10.71±2.32	10.65±2.32	10.79±1.38	10.00±0.31		4	10.78±1.44	11.65±3.52	10.05±1.23	11.54±1.21
	ratio (g/100g)	6	0.39±0.08	0.38±0.07	0.38±0.05	0.37±0.03		4	0.32±0.06	0.35±0.08	0.31±0.03	0.35±0.02
Liver	organ weight (g)	6	50.41±2.58	49.74±5.49	51.21±4.18	53.22±4.58		4	57.5±4.15	54.67±3.20	55.41±7.79	55.89±5.00
	ratio (g/100g)	6	1.83±0.11	1.78±0.19	1.79±0.18	1.95±0.20		4	1.71±0.04	1.68±0.10	1.72±0.10	1.72±0.10
Spleen	organ weight (g)	6	2.85±0.73	3.24±0.65	4.10±1.06*	2.53±0.60		4	3.11±1.21	3.16±1.00	3.92±0.70	3.88±1.60
	ratio (g/100g)	6	0.10±0.03	0.12±0.02	0.14±0.04*	0.09±0.02		4	0.09±0.03	0.10±0.02	0.12±0.02	0.12±0.03
Kidney	organ weight (g)	6	12.06±0.40	13.62±2.23	12.55±1.34	12.82±0.91		4	12.70±1.20	14.82±2.29	12.83±0.53	11.88±1.69
	ratio (g/100g)	6	0.44±0.03	0.49±0.07	0.44±0.04	0.47±0.04		4	0.38±0.04	0.45±0.06*	0.40±0.03	0.36±0.02
Brain	organ weight (g)	6	66.22±5.39	70.16±4.74	68.72±5.76	65.51±6.67		4	70.53±3.39	65.79±9.59	72.48±5.39	68.18±4.88
	ratio (g/100g)	6	2.39±0.16	2.52±0.29	2.40±0.25	2.40±0.25		4	2.11±0.20	2.03±0.30	2.27±0.07	2.10±0.21
Thymic	organ weight (g)	6	2.084±0.573	2.079±0.771	2.629±0.824	1.555±0.327		4	3.596±1.686	3.937±2.956	2.662±0.747	3.576±1.070
	ratio (g/100g)	6	0.075±0.020	0.074±0.027	0.091±0.024	0.057±0.014		4	0.107±0.054	0.117±0.077	0.083±0.020	0.112±0.040
Adrenal	organ weight (g)	6	0.509±0.073	0.600±0.093	0.544±0.089	0.581±0.116		4	0.658±0.234	0.527±0.088	0.587±0.036	0.576±0.160
	ratio (g/100g)	6	0.018±0.003	0.022±0.004	0.019±0.002	0.021±0.004		4	0.020±0.007	0.016±0.002	0.018±0.001	0.018±0.005
Thyroid	organ weight (g)	6	0.261±0.058	0.260±0.048	0.277±0.065	0.207±0.037		4	0.316±0.041	0.315±0.071	0.337±0.040	0.318±0.224
	ratio (g/100g)	6	0.010±0.003	0.009±0.001	0.010±0.002	0.008±0.002		4	0.009±0.001	0.010±0.002	0.011±0.001	0.009±0.005
Testicular	organ weight (g)	3	1.578±0.618	1.256±0.358	4.801±4.620	1.476±0.801		2	7.296±7.850	2.314±0.291	2.598±0.719	1.820±0.588
	ratio (g/100g)	3	0.054±0.018	0.044±0.010	0.155±0.141	0.052±0.025		2	0.201±0.207	0.068±0.014	0.076±0.023	0.051±0.009
Epididymis	organ weight (g)	3	0.677±0.133	0.675±0.151	1.119±0.665	0.693±0.282		2	1.507±1.020	1.092±0.375	1.295±0.901	1.353±0.280
	ratio (g/100g)	3	0.023±0.003	0.024±0.003	0.037±0.019	0.025±0.008		2	0.042±0.025	0.032±0.008	0.038±0.027	0.039±0.002
Uterine	organ weight (g)	3	2.451±0.848	2.939±0.917	4.142±0.183	3.893±1.341		2	3.708±0.478	3.079±0.728	4.078±1.653	2.820±1.136
	ratio (g/100g)	3	0.093±0.031	0.107±0.034	0.151±0.013	0.143±0.043		2	0.114±0.028	0.100±0.029	0.137±0.055	0.093±0.038
Ovarian	organ weight (g)	3	0.211±0.112	0.290±0.078	0.393±0.229	0.233±0.05		2	0.317±0.085	0.270±0.006	0.279±0.048	0.255±0.011
	ratio (g/100g)	3	0.008±0.004	0.011±0.003	0.014±0.008	0.009±0.001		2	0.010±0.001	0.009±0.000	0.009±0.002	0.008±0.000
Note: Data were expressed as means ± SD. P > 0.05 when compared to the control group.

## Sheet: Supplementary Table 7
Supplementary Table 7. Effect of hUC-MSCs on Anatomic Pathology in Cynomolgus Monkeys
Lesions	Time of Euthanasia	Control		3.0×106cells/kg i.v		3.0×107cells/kg i.v		3.0×107cells/kg s.c
		♀	♂	♀	♂	♀	♂	♀	♂
Focal inflammatory cell infiltration in heart	T	3(−)	3(−)	3(−)	3(−)	2(−)1(+)	3(−)	3(−)	3(−)
	R	2(−)	2(−)	1(−)1(+)	1(−)1(+)	2(−)	2(−)	2(−)	2(−)
Scattered micro granuloma in liver	T	3(−)	3(−)	3(−)	3(−)	3(−)	2(−)1(+)	3(−)	3(−)
	R	2(−)	2(−)	2(−)	2(−)	2(−)	2(−)	2(−)	2(−)
Gallbladder	T	3(−)	3(−)	3(−)	3(−)	3(−)	3(−)	3(−)	3(−)
	R	2(−)	2(−)	2(−)	2(−)	2(−)	2(−)	2(−)	2(−)
Focal inflammatory cell infiltration in kidney	T	2(−)1(+)	2(−)1(+)	3(−)	3(−)	3(−)	3(−)	3(−)	3(−)
	R	2(−)	2(−)	2(−)	2(−)	2(−)	1(−)1(+)	2(−)	2(−)
Adrenal gland	T	3(−)	3(−)	3(−)	3(−)	3(−)	3(−)	3(−)	3(−)
	R	2(−)	2(−)	2(−)	2(−)	2(−)	2(−)	2(−)	2(−)
Lung	T	3(−)	3(−)	3(−)	3(−)	3(−)	3(−)	3(−)	3(−)
	R	2(−)	2(−)	2(−)	2(−)	2(−)	2(−)	2(−)	2(−)
Spleen	T	3(−)	3(−)	3(−)	3(−)	3(−)	3(−)	3(−)	3(−)
	R	2(−)	2(−)	2(−)	2(−)	2(−)	2(−)	2(−)	2(−)
Brain (brain, cerebellum, brain stem)	T	3(−)	3(−)	3(−)	3(−)	3(−)	3(−)	3(−)	3(−)
	R	2(−)	2(−)	2(−)	2(−)	2(−)	2(−)	2(−)	2(−)
Spinal cord (cervical, thoracic ,lumbar)	T	3(−)	3(−)	3(−)	3(−)	3(−)	3(−)	3(−)	3(−)
	R	2(−)	2(−)	2(−)	2(−)	2(−)	2(−)	2(−)	2(−)
Pituitary	T	3(−)	3(−)	3(−)	3(−)	3(−)	3(−)	3(−)	3(−)
	R	2(−)	2(−)	2(−)	2(−)	2(−)	2(−)	2(−)	2(−)
Stomach	T	3(−)	3(−)	3(−)	3(−)	3(−)	3(−)	3(−)	3(−)
	R	2(−)	2(−)	2(−)	2(−)	2(−)	2(−)	2(−)	2(−)
Duodenum	T	3(−)	3(−)	3(−)	3(−)	3(−)	3(−)	3(−)	3(−)
	R	2(−)	2(−)	2(−)	2(−)	2(−)	2(−)	2(−)	2(−)
Jejunum	T	3(−)	3(−)	3(−)	3(−)	3(−)	3(−)	3(−)	3(−)
	R	2(−)	2(−)	2(−)	2(−)	2(−)	2(−)	2(−)	2(−)
Ileum	T	3(−)	3(−)	3(−)	3(−)	3(−)	3(−)	3(−)	3(−)
	R	2(−)	2(−)	2(−)	2(−)	2(−)	2(−)	2(−)	2(−)
Cecum	T	3(−)	3(−)	3(−)	3(−)	3(−)	3(−)	3(−)	3(−)
	R	2(−)	2(−)	2(−)	2(−)	2(−)	2(−)	2(−)	2(−)
Colon	T	3(−)	3(−)	3(−)	3(−)	3(−)	3(−)	3(−)	3(−)
	R	2(−)	2(−)	2(−)	2(−)	2(−)	2(−)	2(−)	2(−)
Rectum	T	3(−)	3(−)	3(−)	3(−)	3(−)	3(−)	3(−)	3(−)
	R	2(−)	2(−)	2(−)	2(−)	2(−)	2(−)	2(−)	2(−)
Trachea	T	3(−)	3(−)	3(−)	3(−)	3(−)	3(−)	3(−)	3(−)
	R	2(−)	2(−)	2(−)	2(−)	2(−)	2(−)	2(−)	2(−)
Esophagus	T	3(−)	3(−)	3(−)	3(−)	3(−)	3(−)	3(−)	3(−)
	R	2(−)	2(−)	2(−)	2(−)	2(−)	1(−)1(+)	2(−)	2(−)
Aorta	T	3(−)	3(−)	3(−)	3(−)	3(−)	3(−)	3(−)	3(−)
	R	2(−)	2(−)	2(−)	2(−)	2(−)	2(−)	2(−)	2(−)
Thyroid	T	3(−)	3(−)	3(−)	3(−)	3(−)	3(−)	3(−)	3(−)
	R	2(−)	2(−)	2(−)	2(−)	2(−)	2(−)	2(−)	2(−)
Parathyroid glands	T	3(−)	3(−)	3(−)	3(−)	3(−)	3(−)	3(−)	3(−)
	R	2(−)	2(−)	2(−)	2(−)	2(−)	2(−)	2(−)	2(−)
Thymus	T	3(−)	3(−)	3(−)	3(−)	3(−)	3(−)	3(−)	3(−)
	R	2(−)	2(−)	2(−)	2(−)	2(−)	2(−)	2(−)	2(−)
Pancreas	T	3(−)	3(−)	3(−)	3(−)	3(−)	3(−)	3(−)	3(−)
	R	2(−)	2(−)	2(−)	2(−)	2(−)	1(−)1(+)	2(−)	2(−)
Mesenteric lymph node	T	3(−)	3(−)	3(−)	3(−)	3(−)	3(−)	3(−)	3(−)
	R	2(−)	2(−)	2(−)	2(−)	2(−)	2(−)	2(−)	2(−)
Salivary glands	T	3(−)	3(−)	3(−)	3(−)	3(−)	3(−)	3(−)	3(−)
	R	2(−)	2(−)	2(−)	2(−)	2(−)	2(−)	2(−)	2(−)
Note：Animal number followed (lesion degree),"-" indicates there was no pathologic change; pathologic changes were shown by ‘‘ + , + +, + + +’’ from mild to severe; "T"indicated that the monkeys were euthanized at the end of the dosing phase; "R" indicated that the monkeys were euthanized at the end of the recovery period ;"NA" indicated that the absence of the tissue on the animal (eg, Ovarian fo…
Supplementary Table 7.2 Effect of Human Umbilica Cord Mesenchymal Stem Cells on Anatomic Pathology in Cynomolgus Monkeys
Lesions	Time of Euthanasia	Control		3.0×106cells/kg i.v		3.0×107cells/kg i.v		3.0×107cells/kg s.c
		♀	♂	♀	♂	♀	♂	♀	♂
Testis	T	NA	3(−)	NA	3(−)	NA	3(−)	NA	3(−)
	R	NA	2(−)	NA	2(−)	NA	2(−)	NA	2(−)
Epididymis	T	NA	3(−)	NA	3(−)	NA	3(−)	NA	3(−)
	R	NA	2(−)	NA	2(−)	NA	2(−)	NA	2(−)
Prostate	T	NA	3(−)	NA	3(−)	NA	3(−)	NA	3(−)
	R	NA	2(−)	NA	2(−)	NA	2(−)	NA	2(−)
Seminal vesicle	T	NA	3(−)	NA	3(−)	NA	3(−)	NA	3(−)
	R	NA	2(−)	NA	2(−)	NA	2(−)	NA	2(−)
Ovary	T	3(−)	NA	3(−)	NA	3(−)	NA	3(−)	NA
	R	2(−)	NA	2(−)	NA	2(−)	NA	2(−)	NA
Fallopian tube	T	3(−)	NA	3(−)	NA	3(−)	NA	3(−)	NA
	R	2(−)	NA	2(−)	NA	2(−)	NA	2(−)	NA
Uterus (including cervix)	T	3(−)	NA	3(−)	NA	3(−)	NA	3(−)	NA
	R	2(−)	NA	2(−)	NA	2(−)	NA	2(−)	NA
Vagina	T	3(−)	NA	3(−)	NA	3(−)	NA	3(−)	NA
	R	2(−)	NA	2(−)	NA	2(−)	NA	2(−)	NA
Mild hyperemia , inflammatory cell infiltration in bladder	T	3(−)	2(−)1(+)	3(−)	3(−)	3(−)	3(−)	3(−)	3(−)
	R	2(−)	NA	2(−)	1(−)1(+)	2(−)	NA	2(−)	NA
Skin (including mammary gland)	T	3(−)	3(−)	3(−)	3(−)	3(−)	3(−)	3(−)	3(−)
	R	2(−)	2(−)	2(−)	2(−)	2(−)	2(−)	2(−)	2(−)
Sciatic nerve	T	3(−)	3(−)	3(−)	3(−)	3(−)	3(−)	3(−)	3(−)
	R	2(−)	2(−)	2(−)	2(−)	2(−)	2(−)	2(−)	2(−)
Skeletal muscle	T	3(−)	3(−)	3(−)	3(−)	3(−)	3(−)	3(−)	3(−)
	R	2(−)	2(−)	2(−)	2(−)	2(−)	2(−)	2(−)	2(−)
Eye	T	3(−)	3(−)	3(−)	3(−)	3(−)	3(−)	3(−)	3(−)
	R	2(−)	2(−)	2(−)	2(−)	2(−)	2(−)	2(−)	2(−)
Bone marrow (sternum)	T	3(−)	3(−)	3(−)	3(−)	3(−)	3(−)	3(−)	3(−)
	R	2(−)	2(−)	2(−)	2(−)	2(−)	2(−)	2(−)	2(−)
Bone (femur)	T	3(−)	3(−)	3(−)	3(−)	3(−)	3(−)	3(−)	3(−)
	R	2(−)	2(−)	2(−)	2(−)	2(−)	2(−)	2(−)	2(−)
subcutaneous granulomatous (back skin)	T	3(−)	3(−)	NA	NA	NA	NA	3(+++)	3(+++)
	R	2(−)	2(−)	NA	NA	NA	NA	2(++)	2(++)
Injection site : vascular wall and adjacent interstitium Granulosis	T	1(−)2(++)	1(−)2(++)	3(−)	1(−)2(++)	2(−)1(++)	1(−)2(++)	NA	NA
	R	1(-)1(+)	2(−)	2(−)	2(−)	1(−)1(+)	1(−)1(+)	NA	NA
Axillary lymph node	T	3(−)	3(−)	3(−)	3(−)	3(−)	3(−)	3(−)	3(−)
	R	2(−)	2(−)	2(−)	2(−)	2(−)	2(−)	2(−)	2(−)
Inguinal lymph node	T	3(−)	3(−)	3(−)	3(−)	3(−)	3(−)	3(−)	3(−)
	R	2(−)	2(−)	2(−)	2(−)	2(−)	2(−)	2(−)	2(−)
Note：Animal number followed (lesion degree),"-" indicates there was no pathologic change; pathologic changes were shown by ‘‘ + , + +, + + +’’ from mild to severe; "T"indicated that the monkeys were euthanized at the end of the dosing phase; "R" indicated that the monkeys were euthanized at the end of the recovery period ;"NA" indicated that the absence of the tissue on the animal (eg, Ovarian fo…

## Sheet: Supplemental Table 8
Supplemental Table 8. Abnormal symptoms of cynomolgus monkeys in the IVH group after administrations of hUC-MSCs
Symptoms	1st dosing (D1)	2nd dosing (D3)	3rd dosing (D8)	4th dosing (D10)	5th dosing (D15)	6th dosing（D17)
Coma	0/10	0/10	1/10	3/10	0/10	0/10
Decreased breath rate	0/10	0/10	1/10	6/10	3/10	4/10
Low mobility	0/10	0/10	0/10	3/10	2/10	3/10
Dilated pupil	0/10	0/10	0/10	4/10	3/10	6/10
Exhaustion	0/10	0/10	0/10	0/10	1/10	3/10
Eyelid closure	0/10	0/10	0/10	0/10	1/10	0/10

## Sheet: Supplementary Table 9
Supplementary Table 9. Allergic reactions symptoms of guinea pigs in each group after provovation in ASA study
Group	Test item	Dose of sensitization	Dose of provocation	Animal ID	Allergic reactions symptoms of provocation （14th day after sensitization）	Score	Animal ID	Allergic reactions symptoms of provocation （21st day after sensitization）	Score
Negative control group	0.9% sodium chloride	0.5 mL/animal	1 mL/animal	23	Normal	-	49	Normal	-
				9	Normal	-	13	Normal	-
				56	Normal	-	36	Normal	-
				2	Normal	-	6	Normal	-
Positive control group	ovalbumin	10 mg/animal	20 mg/animal	35	A、D、K、M、N、O、Q、T	++++	57	A、D、F、K、M、O、Q、T	++++
				5	A、D、Q	+++	45	A、D、Q	+++
				26	A、D、F、Q	+++	14	A、D、K、M、N、Q、T	++++
				38	A、D、K、M、O、Q、T	++++	34	A、D、F、Q	+++
low-dose group	hUC-MSCs	0.25×106 cells/animal	0.5×106 cells/animal	47	Normal	-	27	Normal	-
				17	Normal	-	29	Normal	-
				28	Normal	-	78	Normal	-
				58	Normal	-	18	Normal	-
high-dose group	hUC-MSCs	0.5×106 cells/animal	1×106 cells/animal	15	Normal	-	19	Normal	-
				39	Normal	-	37	Normal	-
				68	Normal	-	8	Normal	-
				4	Normal	-	48	Normal	-
Note：allergic reactions symptoms：A: restlessness, B：hair erection, C: shaking, D: scratching nose, E: sneeze, F: cough, G: tachypnea, H: urination, I: defecation, J: lacrimation, K: dyspnea, L: wheezing, M: purpura, N: gait instability, O: Jumping, P: pant, Q: spasm, R: rotation, S: Tidal breathing, T: death.
Score：- Negative, +weakly positive, ++positive, +++strongly positive, ++++extremely strong positive.

## Sheet: Supplementary Figure 1
Supplementary figure 1. Representative abnormal ECG waveforms of cynomolgus monkeys in IVH group. (A) Normal cynomolgus monkey ECG; (B) ST segment depression; (C) T wave amplitude increase.
